# Supplementary material
Source: PubMed Central journal article supplement (PMC4961592)
Supplement: NIHMS792020-supplement-supp_info.pdf [file NIHMS792020-supplement-supp_info.pdf]

## **Supplementary Discussion**

### **Discussion of prior work on NCIN hypothesis.**

An early study reported incorporation of  $\text{NAD}^+$  into initial products by *E. coli* RNAP *in vitro*<sup>34</sup>. However, the work involved only promoter-independent transcription on the homopolymer template poly(dA-dT):poly(dA-dT), did not directly demonstrate the identity of the initial products, and did not demonstrate the ability of the initial products to be extended to yield longer products<sup>34</sup>. Subsequent studies attempted, but failed, to detect the incorporation of  $\text{NAD}^+$ , NADH, and dpCoA into RNA during transcription initiation by *E. coli* RNAP<sup>4,5</sup>. However, a technical issue with assay conditions used in these studies--i.e., the use of ATP concentrations able to out-compete, and make undetectable, transcription initiation by  $\text{NAD}^+$ , NADH, and dpCoA--may render the negative results in this study non-determinative. Here, we re-examine the NCIN hypothesis using an assay of promoter-dependent transcription, directly assessing the identity of the initial products, directly assessing the ability of the initial products to be extended to yield longer products, and using assays that do not contain ATP concentrations able to out-compete  $\text{NAD}^+$ , NADH, and dpCoA.

### **Discussion of crystal structures of RPo-pppApC, RPo-NAD<sup>+</sup>pC, RPo-dpCoApC.**

A crystal structure of a substrate complex for transcription initiation, consisting of RPo, ATP as initiating nucleotide, and CMPcPP as extending nucleotide, previously has been reported<sup>16,17</sup>. However, no crystal structure of an initial product complex for transcription initiation previously has been reported. The crystal structure of the initial product complex obtained herein for initiation with ATP and CTP (RPo-pppApC) shows ordered density for all non-hydrogen atoms of pppApC (Figure 4a, left). The pppA residue of pppApC base pairs to the

DNA template strand in the RNAP active-center "i-1 site" and interacts, through its  $\alpha$ -phosphate, with the same RNAP residues that interact with the  $\gamma$ -phosphate of the initiating nucleotide in the substrate complex ( $\beta$ Q688 and  $\beta$ H1237; residues numbered as in *E. coli* RNAP; <sup>16,17</sup> and, through its  $\beta$ - and  $\gamma$ -phosphates, with  $\beta$ R529 and  $\beta$ K1242 (Figure 4a, right). The pC residue of pppApC base pairs with the DNA template strand in the RNAP active-center "i site," making interactions, through its sugar and phosphate, with the RNAP catalytic  $Mg^{2+}$  ion [ $Mg^{2+}$  (I)], and RNAP residues, notably  $\beta$ K1065 and  $\beta$ K1073, that are identical to those made by the sugar and  $\alpha$ -phosphate of the initiating nucleotide in the substrate complex (Figure 4a, right; <sup>16,17</sup>).

Strikingly, the organization of the RNAP active center enables the same RNAP residues ( $\beta$ Q688 and  $\beta$ H1237) to interact with the  $\alpha$ -phosphate of the initiating nucleotide in the product complex and the  $\gamma$ -phosphate of the initiating nucleotide in the substrate complex and enables the same RNAP residues ( $\beta$ K1065 and  $\beta$ K1073) to interact with the  $\alpha$ -phosphate of the extending nucleotide in the product complex and the  $\alpha$ -phosphate of the initiating nucleotide in the substrate complex.

The crystal structure of the initial product complex obtained upon initiation with  $NAD^+$  and CTP (Rpo- $NAD^+$ pC) shows ordered density for all non-hydrogen atoms of  $NAD^+$ pC (Figure 4b, left). The  $NAD^+$  residue of  $NAD^+$ pC base pairs to the DNA template strand in the RNAP "i-1 site," making interactions through its base and phosphates identical to those in the product complex for initiation with ATP (Figures 4a-b, right), and making additional interactions through its nicotinamide ribonucleoside moiety with RNAP  $\beta$ D516 and  $\beta$ H1237 (Figure 4b, right). The pC residue of  $NAD^+$ pC base pairs to the DNA template strand in the RNAP active-center "i site," making the same interactions as in the product complex for initiation with ATP (Figures 4a-b, right).

The crystal structure of the initial product complex obtained upon initiation with dpCoA and CTP (RPo-dpCoApC) shows ordered electron density for the adenosine diphosphate moiety and two atoms of the pantetheine moiety of the dpCoA residue and for all atoms of the pC residue (Figure 4c, left). The dpCoA residue of dpCoApC base pairs to the DNA template strand in the RNAP "i-1 site," making interactions through its base and phosphates identical to those in the product complex for initiation with ATP (Figures 4a,c, right). The first two atoms of the pantetheine moiety project into a space having sufficient volume to accommodate the pantetheine moiety in multiple conformational states; terminal atoms of the pantetheine moiety are disordered, suggesting conformational heterogeneity (i.e., flexibility). The pC residue of dpCoApC base pairs to the DNA template strand in the RNAP active-center "i site," making the same interactions as in the product complex for initiation with ATP (Figures 4a,c, right).

### **Discussion of structural basis of specificity at promoter position -1.**

The crystal structures of product complexes in Figure 4 demonstrate NCIN-mediated initiation but do not explain the specificity of  $\text{NAD}^+$ -mediated initiation for an A:T base pair at promoter position -1. A definitive explanation for the specificity at promoter position -1 must await determination of an  $\text{NAD}^+$ -containing substrate complexes (i.e., RPo- $\text{NAD}^+$ -NTP). However, model building suggests that, in an  $\text{NAD}^+$ -containing substrate complex, the  $\text{NAD}^+$  nicotinamide moiety can be positioned to form a "pseudo-base pair" with template-strand T at position -1, forming two H-bonds with Watson-Crick H-bonding atoms of the template-strand thymine base at position -1 and stacking on the  $\text{NAD}^+$  adenine base.

**Supplementary Table 1. Oligonucleotides used to generate templates for transcription assays.**

| <b>Name</b> | <b>Description</b>                                                                                                                          | <b>Sequence (5' to 3')</b>                                                                                                                                                                             |
|-------------|---------------------------------------------------------------------------------------------------------------------------------------------|--------------------------------------------------------------------------------------------------------------------------------------------------------------------------------------------------------|
| JB 221      | For cloning NudC- XbaI forward primer                                                                                                       | CAATTCCCCTCTAGAAATAATTTTGTTTAAC<br>TTAAGAAGGAGATATAATGGATCGTATAA<br>TTGAAAAATTAGATCACGGC                                                                                                               |
| JB 222      | For cloning NudC- NotI reverse primer                                                                                                       | GTGCTCGAGTGCGGCCGCGCTGCCGCGCGG<br>CACCAGCTCATACTCTGCCCGACACATCGCC<br>ACCGT                                                                                                                             |
| JB 224      | <i>gadY</i> template (-65 to +35) oligo used in Figures 1b, 2a and 2b                                                                       | AGCGTATAGCTTATGTTTATAAAAAAATGGC<br>TGATCTTATTTCCAGTAAAAGTTATATTTAA<br>CTTACTGAGAGCACAAAGTTTCCCGTGCCAA<br>CAGGGAG                                                                                       |
| JB 228      | Forward primer for amplification of <i>T7A1</i> template                                                                                    | GATTAATTTAAAATTTATCAAAAAGAGTATT<br>GAC                                                                                                                                                                 |
| JB 229      | Reverse primer for amplification of <i>T7A1</i> template                                                                                    | TCGTTGGGATGGCTA                                                                                                                                                                                        |
| JB 230      | Forward primer for amplification of <i>gadY</i> template                                                                                    | AGCGTATAGCTTATG                                                                                                                                                                                        |
| JB 231      | Reverse primer for amplification of <i>gadY</i> template                                                                                    | CTCCCTGTTGGCACGGGAAAC                                                                                                                                                                                  |
| JB 232      | <i>N25</i> template (-65 to +35) oligo used in Figure 2b                                                                                    | ATCCGTCGAGGGAAATCATAAAAAATTTATT<br>TGCTTTCAGGAAAATTTTTCTGTATAATAGA<br>TTCATAAATTTGAGAGAGGAGTTTAAATATG<br>GCTGGTT                                                                                       |
| JB 233      | Forward primer for amplification of <i>N25</i> template                                                                                     | ATCCGTCGAGGGAAATCATAAAAAATTTATT<br>TGC                                                                                                                                                                 |
| JB 234      | Reverse primer for amplification of <i>N25</i> template                                                                                     | AACCAGCCATATTTAAACTCCTC                                                                                                                                                                                |
| JB 235      | <i>T7A1</i> (+2C,+3T) template (-65 to +35) oligo used in Figure 2b                                                                         | GATTAATTTAAAATTTATCAAAAAGAGTATT<br>GACTTAAAGTCTAACCTATAGGATACTTACA<br>GCCaCTGAGAGGGACACGGCGAATAGCCAT<br>CCCAACGA                                                                                       |
| JB 244      | <i>gadY</i> (+1G) template (-65 to +35) oligo used in Figure 2a                                                                             | AGCGTATAGCTTATGTTTATAAAAAAATGGC<br>TGATCTTATTTCCAGTAAAAGTTATATTTAA<br>CTTGCTGAGAGCACAAAGTTTCCCGTGCCAA<br>CAGGGAG                                                                                       |
| JB 281      | Forward primer for amplification of <i>rnaI</i> templates in Figures 1b, 2a and 2b                                                          | CGAGGTATGTAGGCGGTGCTACAG                                                                                                                                                                               |
| JB 288      | <i>rnaI</i> template (-65 to +112, A-less) oligo used to make <i>rnaI</i> (-65 to +35) and (-65 to +112) templates in Figures 1b, 2a and 2b | CGAGGTATGTAGGCGGTGCTACAGAGTTCTT<br>GAAGTGGTGGCCTAACTACGGCTACACTAG<br>AAGAAGTTGTTTTGGTGTCTGCGCTCCTCCT<br>TGCCTGTTTCCCTCGGTTCTTTGTGTTGGTTGC<br>TCTGTGTTCCCTCGTTTTTCCGCCCTGCTTGG<br>CGTTTTTTTCGTTTTCTGTGC |
| JB 251      | Reverse primer (+112) for amplification of <i>rnaI</i> (-65 to +112) A-less template used in Figure 1b                                      | GCACAGAAAACGAAAAACCGCCAAGCAG<br>G                                                                                                                                                                      |

|         |                                                                                                                               |                                                                                                                                                                                                           |
|---------|-------------------------------------------------------------------------------------------------------------------------------|-----------------------------------------------------------------------------------------------------------------------------------------------------------------------------------------------------------|
| JB 287  | <i>rnaI</i> (+1G) template (-65 to +112, A-less) oligo used to make <i>rnaI</i> (+1G) (-65 to +35) template used in Figure 2a | CGAGGTATGTAGGCGGTGCTACAGAGTTCTT<br>GAAGTGGTGGCCTAACTACGGCTACACTAG<br>AAGAGCTTGTGTTTTGGTGTCTGCGCTCCTCCT<br>TGCCTGTTTCCTCGGTTCTTTGTGTTGGTTGC<br>TCTGTGTTCCCTTCGTTTTTCCGCCCTGCTTGG<br>CGGTTTTTTCGTTTTTCTGTGC |
| JB 269  | Reverse primer to amplify <i>rnaI</i> (-65 to +35) and <i>rnaI</i> (+1G) (-65 to +35) templates used in Figures 2a and 2b     | AACAGGCAAGGAGGAGCGCAG                                                                                                                                                                                     |
| JB 270  | <i>N25</i> (+2C, +3T) template (-65 to +35) oligo used in Figure 2b                                                           | ATCCGTCGAGGGAAATCATAAAAAATTTATT<br>TGCTTTCAGGAAAATTTTCTGTATAATAGA<br>TTCACTAATTTGAGAGAGGAGTTTAAATATG<br>GCTGGTT                                                                                           |
| CK01639 | Bubble template, template strand                                                                                              | TGAAGTCTTGTGTGGTCCTGAGAAAGTGTTG<br>AGATCCATGACAGAAAGATTAATAATTGTA<br>TGACTATTTATACGCGTCCTGT                                                                                                               |
| CK01621 | Bubble template, non-template strand (carries 5' biotin)                                                                      | Biotin/ACAGGACGCGTATAAATAGTCATACA<br>ATTATTAATCTTTCACGATCTTTCCTCAACAC<br>TTTCTCAGGACCACACAAGACTTCA                                                                                                        |
| JB 293  | $P_{rnaI}$ forward primer to amplify JB313 for cloning pJB89                                                                  | GCCAGTCTAGACGAGGTATGTAGGCGGTGC<br>TACAG                                                                                                                                                                   |
| JB 303  | MazF-mt3 cut site reverse cloning primer for cloning pJB89 and pJB91                                                          | CTATTCGGATCCAAGGAACG                                                                                                                                                                                      |
| JB 313  | $P_{rnaI}$ (+43 MazF-mt3 cut site) PCR template for cloning pJB89                                                             | CGAGGTATGTAGGCGGTGCTACAGAGTTCTT<br>GAAGTGGTGGCCTAACTACGGCTACACTAG<br>AGAACAGTATTTGGTATCTGCGCTCTGCAC<br>GATGGGTTAATTCGTTCCCTTGATCCGAATA<br>G                                                               |
| JB 306  | $P_{T7AI}$ forward primer to amplify JB315 for cloning pJB91                                                                  | GCCAGTCTAGAGATTAATTTAAAATTTATCA<br>AAAAGAGTATTGAC                                                                                                                                                         |
| JB 315  | $P_{T7AI}$ (+43 MazF-mt3 cut site) PCR template for cloning pJB91                                                             | GATTAATTTAAAATTTATCAAAAAGAGTATT<br>GACTTAAAGTCTAACCTATAGGATACTTACA<br>GCCACAGTATTTGGTATCTGCGCTCTGCACG<br>ATGGGTTAATTCGTTCCCTTGATCCGAATAG                                                                  |
| JB 367  | <i>rnaI</i> (-1C) template (-65 to +112, A-less) oligo used to make <i>rnaI</i> (-1C) (-65 to +35) template used in Figure 2c | CGAGGTATGTAGGCGGTGCTACAGAGTTCTT<br>GAAGTGGTGGCCTAACTACGGCTACACTAG<br>AAGCACTTGTGTTTTGGTGTCTGCGCTCCTCCTT<br>GCCTGTTTCCTCGGTTCTTTGTGTTGGTTGCT<br>CTGTGTTCCCTTCGTTTTTCCGCCCTGCTTGGC<br>GGTTTTTTCGTTTTTCTGTGC |
