# Supplementary material
Source: PubMed Central journal article supplement (PMC4961592)

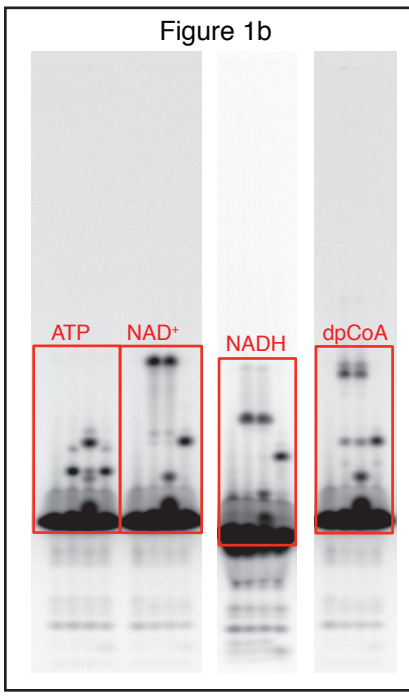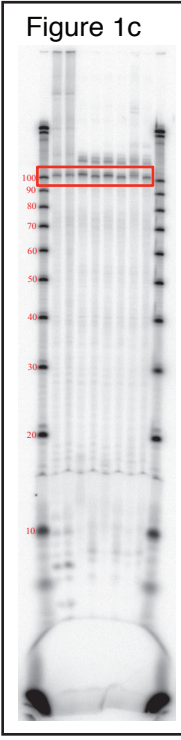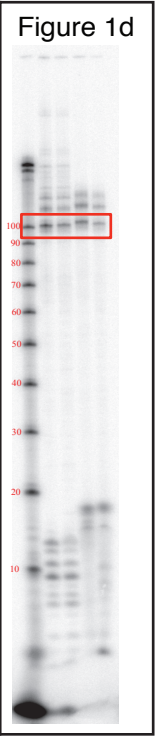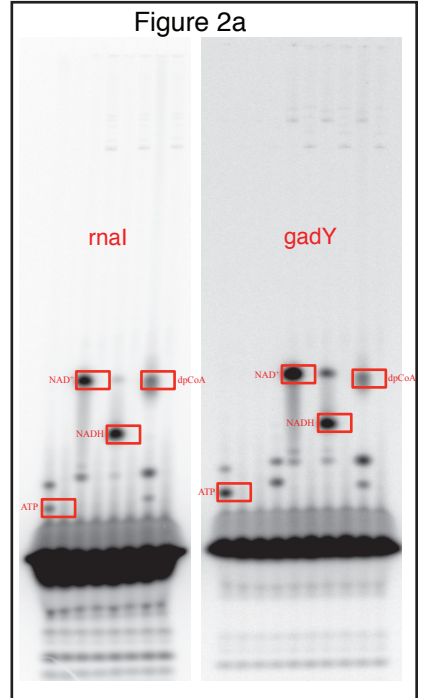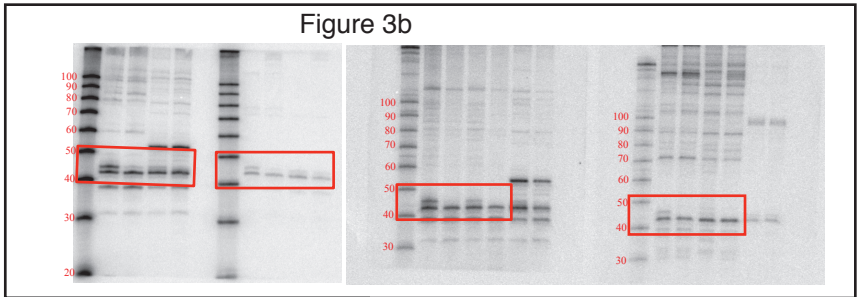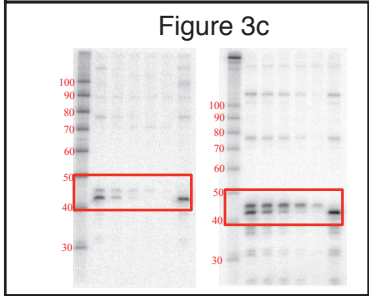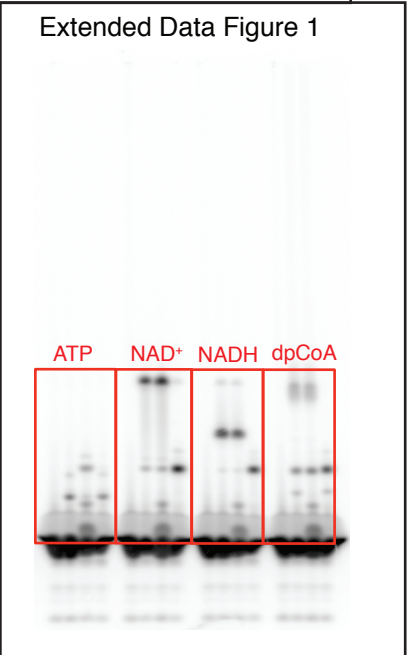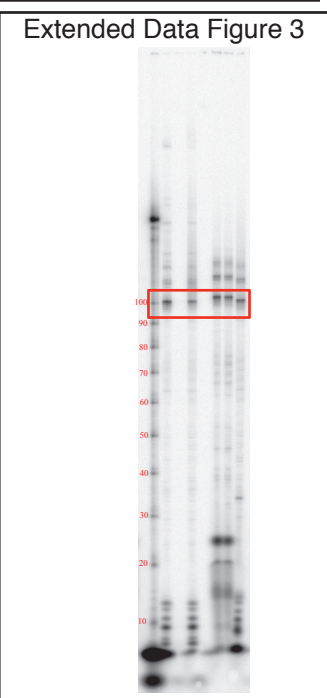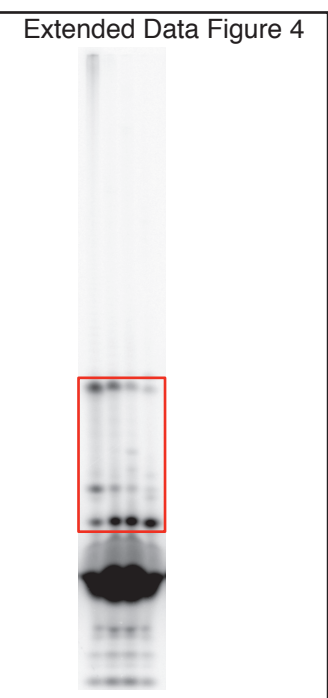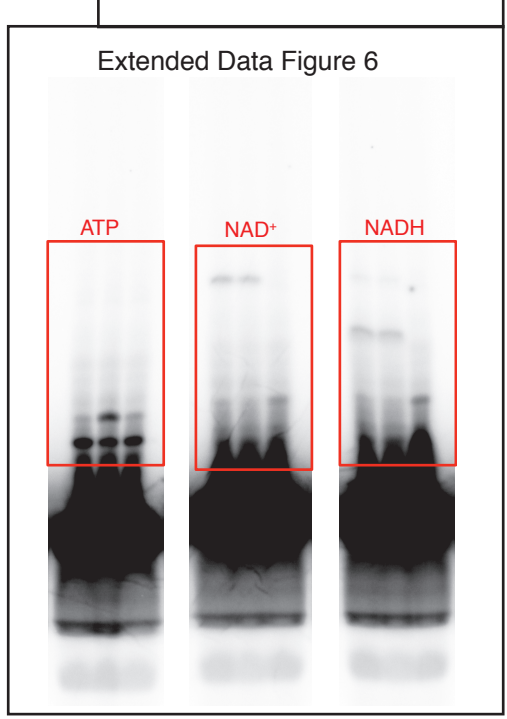

Supplement: NIHMS792020-supplement-supp_figure1.pdf [file NIHMS792020-supplement-supp_figure1.pdf]
